# Supplementary material
Source: publisher figshare collection journal article supplement (https://frontiersin.figshare.com/ndownloader/files/26179682)
Supplement: Supplementary file 1 [file 26179682]

**Original image of the article**

**Figure 3**

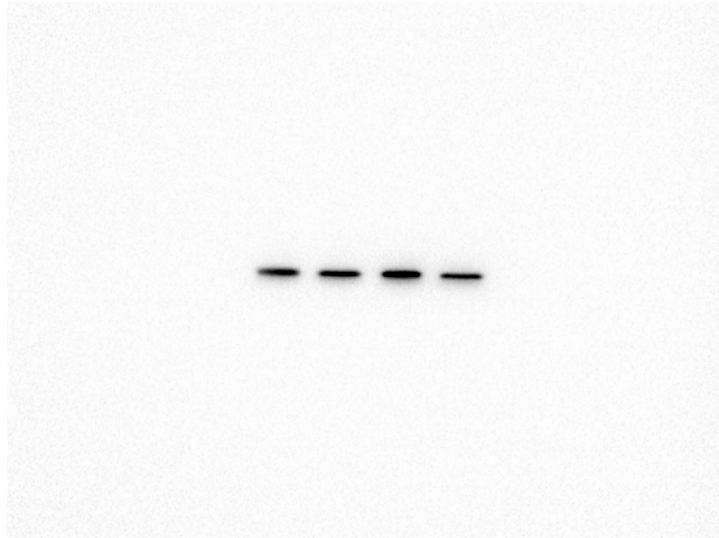

Figure 3A. GADPH protein expression

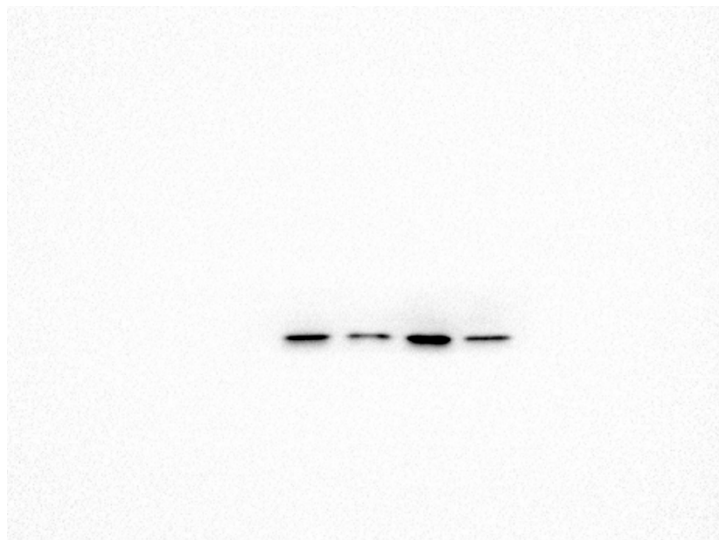

Figure 3A. survivin protein expression

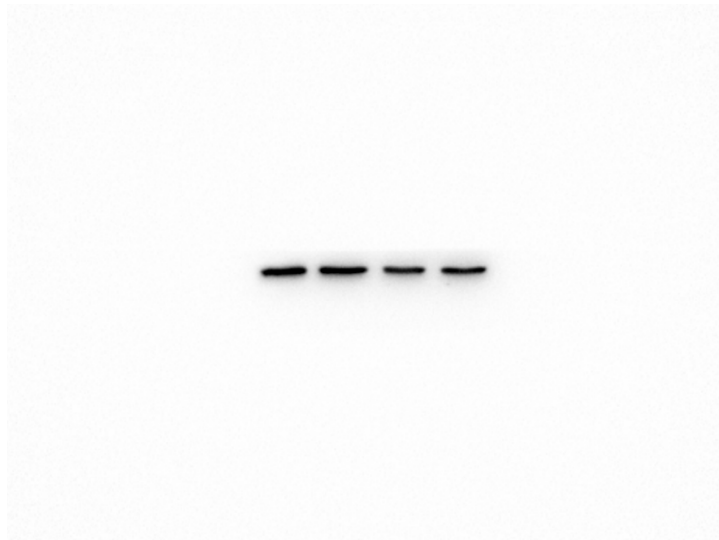

Figure 3A. STAT3 protein expression

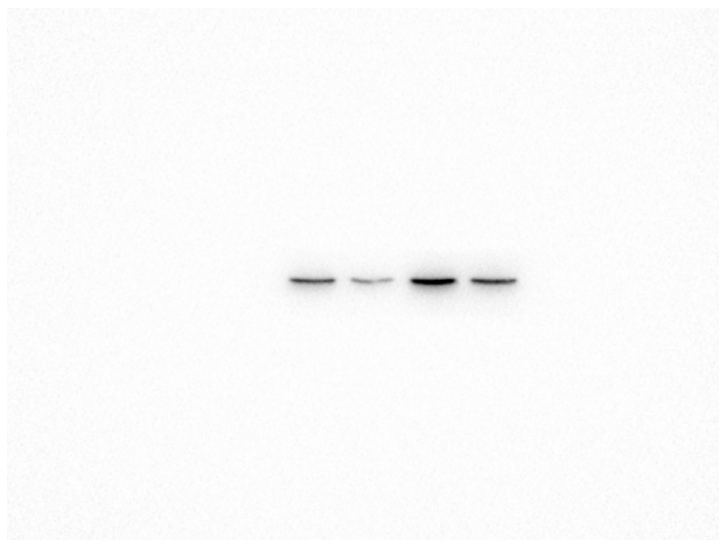

Figure 3A. p-STAT3 protein expression

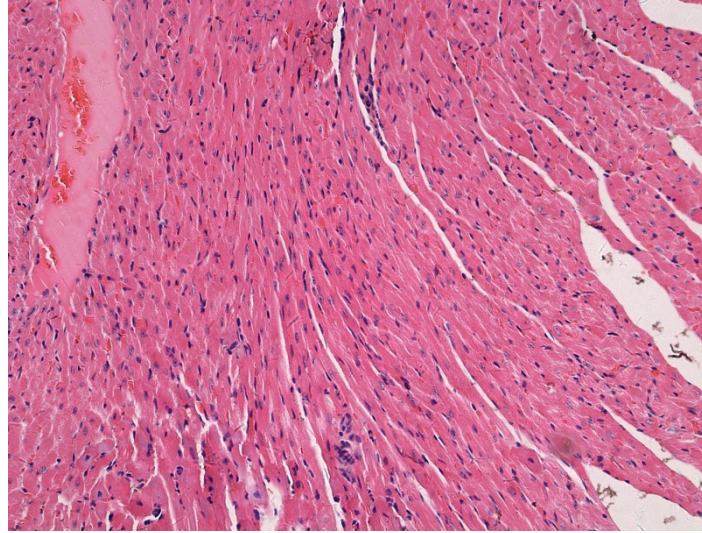

Figure 3B. Cardiac damage was quantified on hematoxylin and eosin staining (NC group)

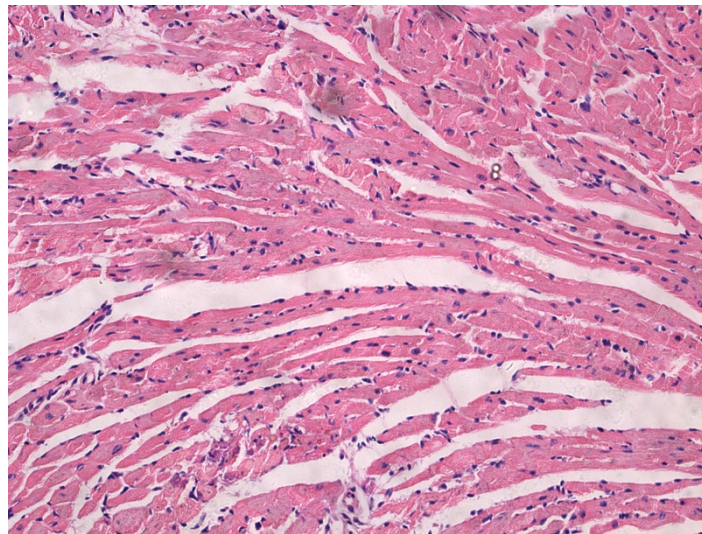

Figure 3B. Cardiac damage was quantified on hematoxylin and eosin staining (AG490 group)

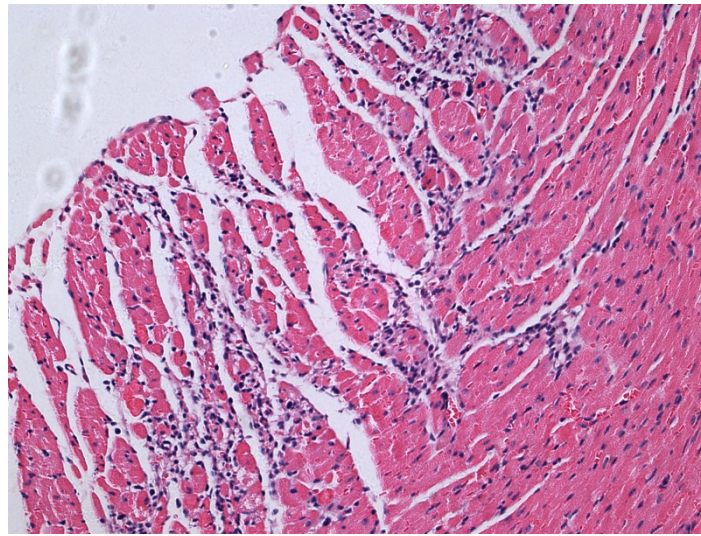

Figure 3B. Cardiac damage was quantified on hematoxylin and eosin staining (CVB3 group)

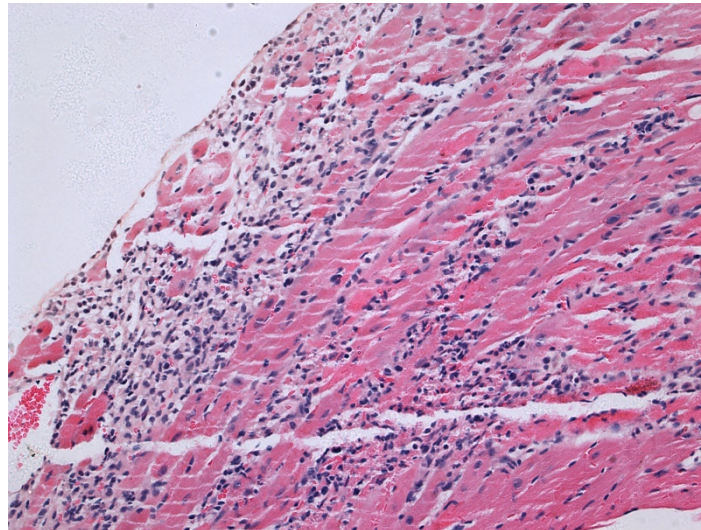

Figure 3B. Cardiac damage was quantified on hematoxylin and eosin staining (CVB3+AG490 group)



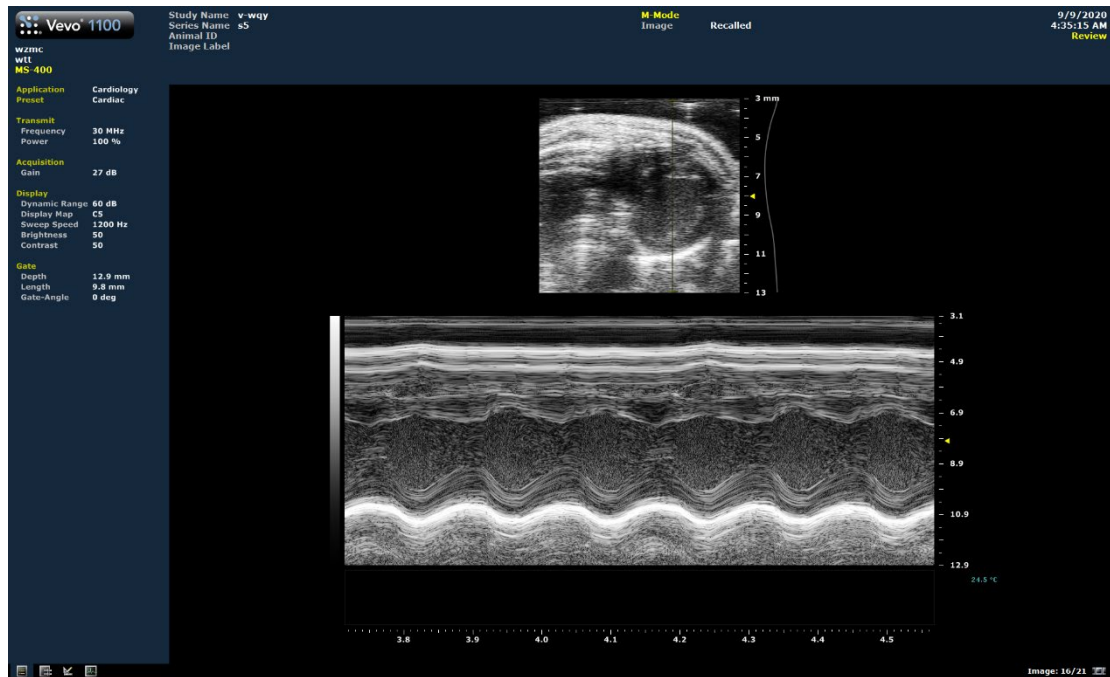

Figure 3C. M-mode echocardiogram images (NC group)

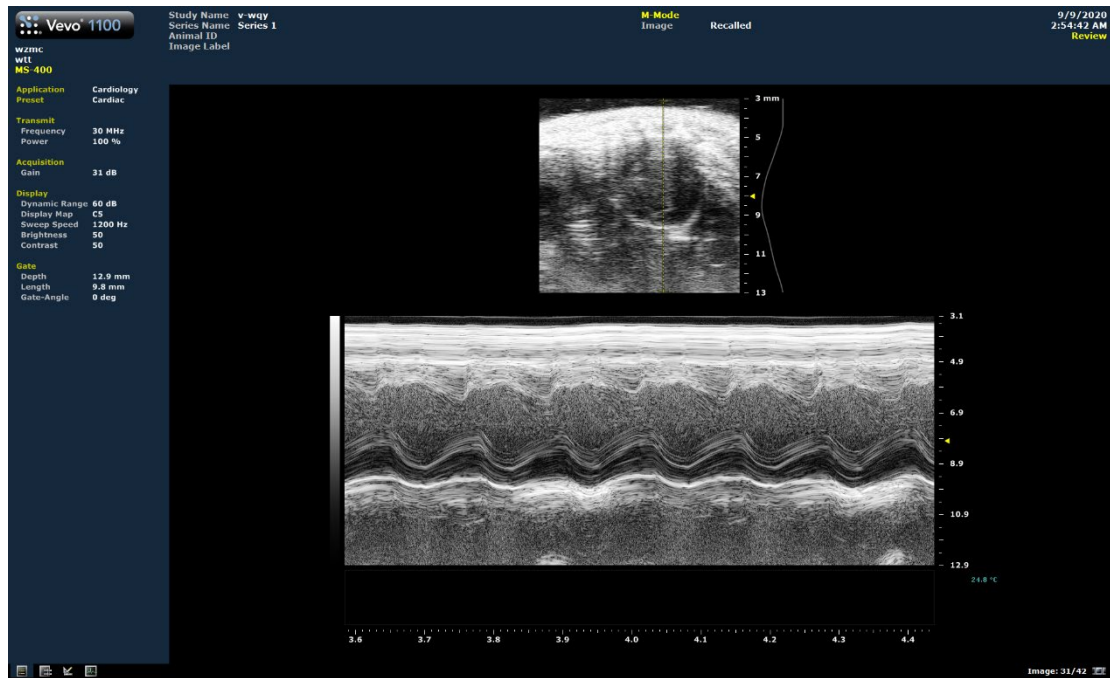

Figure 3C. M-mode echocardiogram images (AG490 group)

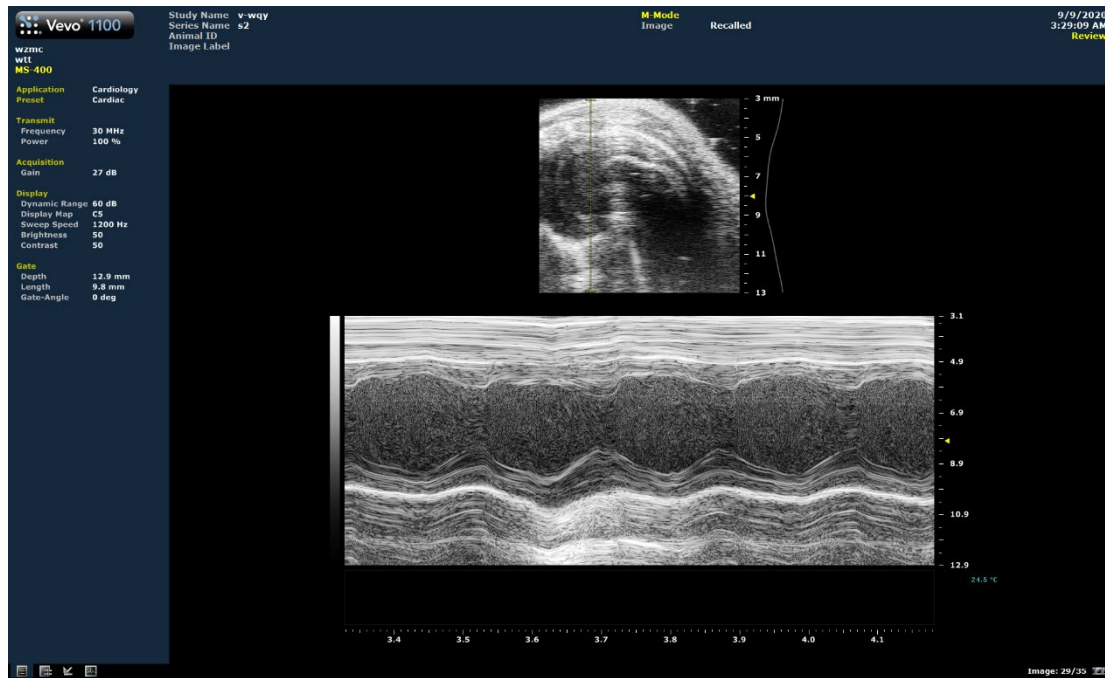

Figure 3C. M-mode echocardiogram images (CVB3 group)

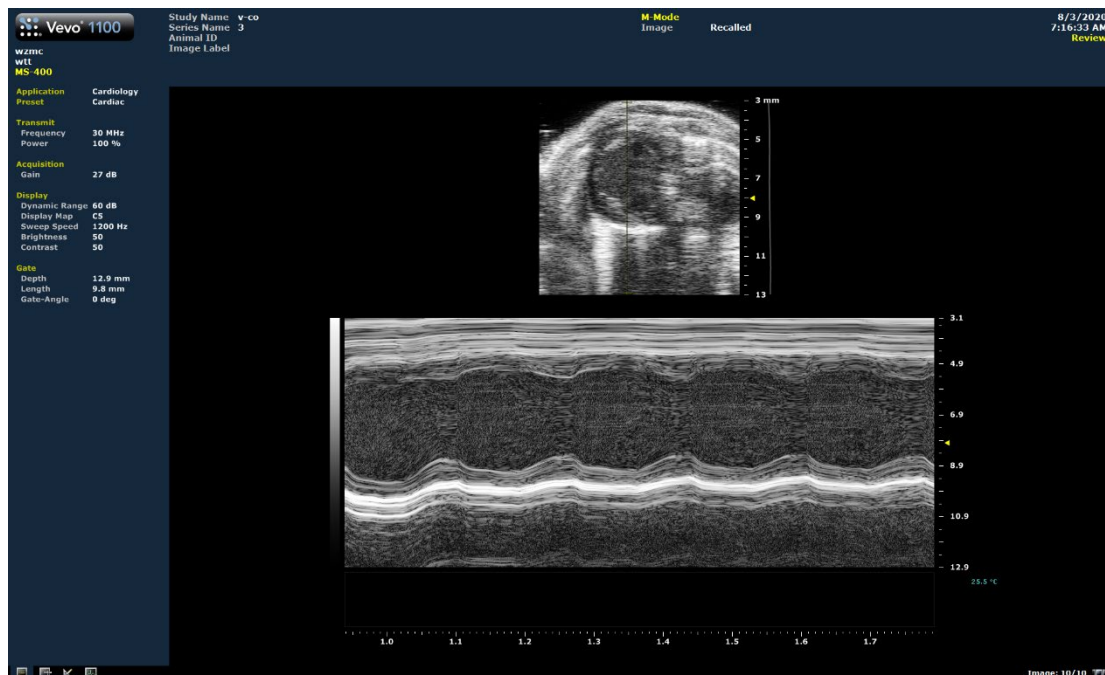

Figure 3C. M-mode echocardiogram images (CVB3+AG490 group)
